# Supplementary material for: Mutation of an Arabidopsis Golgi membrane protein ELMO1 reduces cell adhesion
Source: Oxford University Press journal article supplement (doi:10.1242/dev.199420), 2021-04-27
Supplement: dev199420supp.pdf [file dev199420supp.pdf]

Fig S1

| Position | Mutation | Frequency  | Depth | Gene ID      | Change        |    |
|----------|----------|------------|-------|--------------|---------------|----|
| 14508965 | G→A      |            | 1     | 10 AT1G38460 |               | TE |
| 13828788 | G→A      |            | 1     | 12 AT2G32580 | 3' splice jct |    |
| 4002170  | C→G T A  |            | 1     | 11 AT4G06716 |               | TE |
| 9914031  | C→T A    |            | 1     | 14 AT4G17820 |               | TE |
| 13591422 | C→T A    | 0.97530864 |       | 81 AT3G33055 |               | TE |
| 11733672 | G→A T    | 0.97222222 |       | 36 AT5G31804 |               | TE |
| 17391851 | G→A      | 0.94736842 |       | 22 AT2G41700 |               |    |
| 15849518 | G→A      | 0.93333333 |       | 21 AT2G37810 |               |    |
| 9926214  | G→A      | 0.92307692 |       | 27 AT2G23320 |               |    |
| 3626169  | G→AC     | 0.92063492 |       | 63 AT2G08986 |               |    |
| 15345067 | G→A      | 0.89473684 |       | 22 AT2G36600 |               |    |
| 19484935 | G→A      | 0.88235294 |       | 21 AT2G47480 |               |    |
| 16523746 | C→T      | 0.84444444 |       | 98 AT1G43755 |               |    |
| 3951473  | C→G A T  | 0.84210526 |       | 20 AT4G06698 |               |    |
| 17596170 | G→A      | 0.83333333 |       | 22 AT2G42230 | Pro132Ser     |    |
| 14494092 | C→T      | 0.82608696 |       | 25 AT3G42350 |               |    |
| 17356722 | G→A      | 0.82352941 |       | 19 AT3G47120 |               |    |
| 17141475 | C→T      | 0.80487805 |       | 91 AT1G45223 | Asp68Asp      |    |

**Fig S1.** Allele frequency from DNA sequencing of *elmo1*<sup>-/-</sup> x WT pooled F2. The artMAP program produces a frequency table that maps the location of single nucleotide mutations and their frequency. Only mutations with a frequency of 80% and higher are shown. Position is on the *Arabidopsis thaliana* Col0 version 10 genome. Mutation indicates the WT allele changed to the indicated base. Change indicates the predicted effect of the mutation if there is one. TE indicates predicted transposable element.

Fig S2

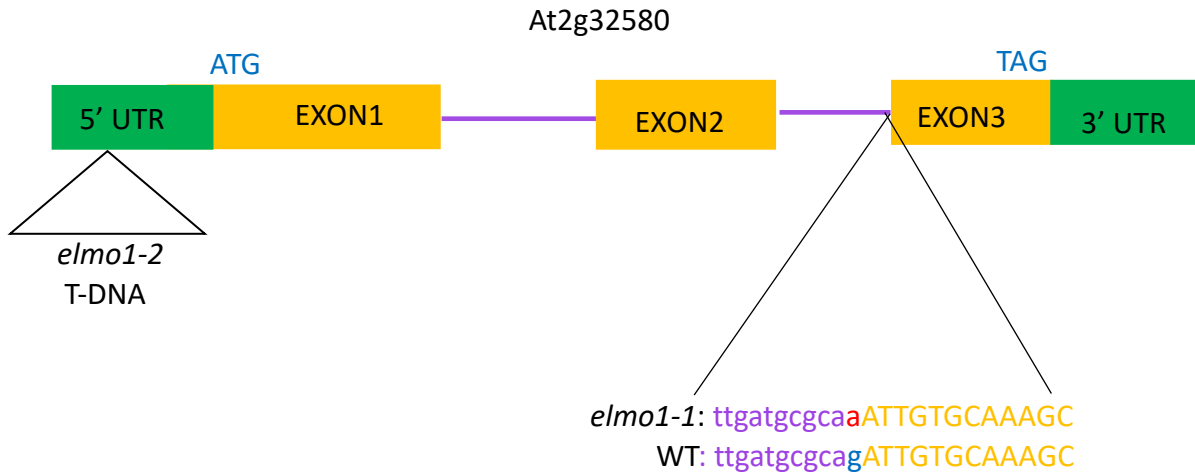

**Fig S2.** Cartoon of At2g32580 identified by genomic sequencing. Location of UTR (green), exons (mustard), introns (purple) and the stop and start codon as indicated. Sequence shows the 3' splice junction of intron 2 with the WT allele G shown in blue and the mutant A in red of the *elmo1-1* allele. The position of the T-DNA insertion in the 5'UTR is indicated for the *elmo1-2* allele.

Fig S3A

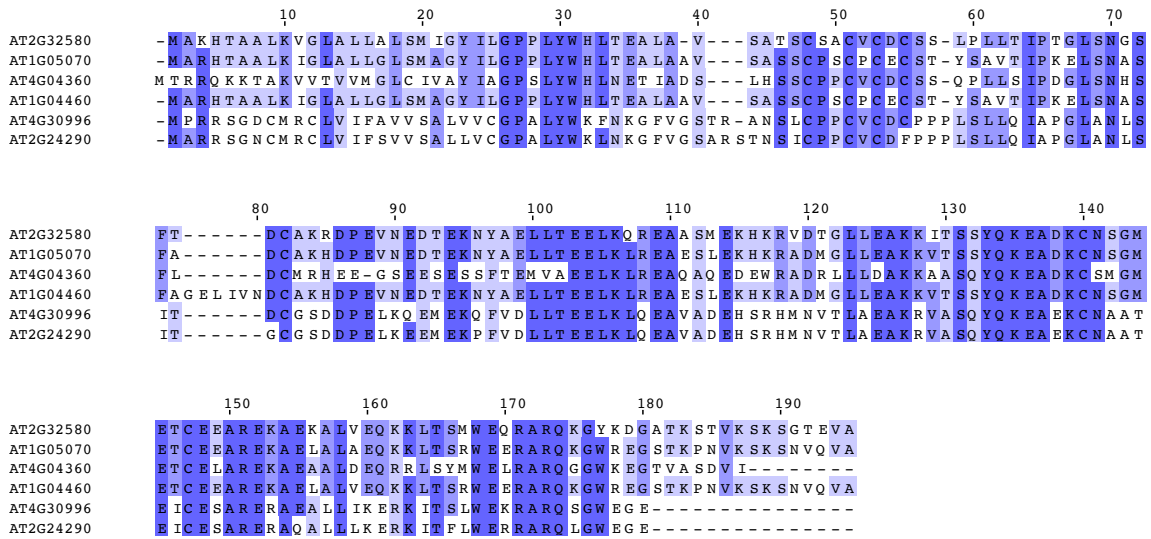

**Fig S3.** Amino acid sequence alignment of At2g32580 (*ELMO1*) and homologs. Exact sequence overlap with At2g32580 is highlighted in blue where darker shades have higher similarity. A) Sequence alignment of Arabidopsis homologues. B) Alignment of Angiosperm homologues with *ELMO1* (At2g32580).



Fig S4

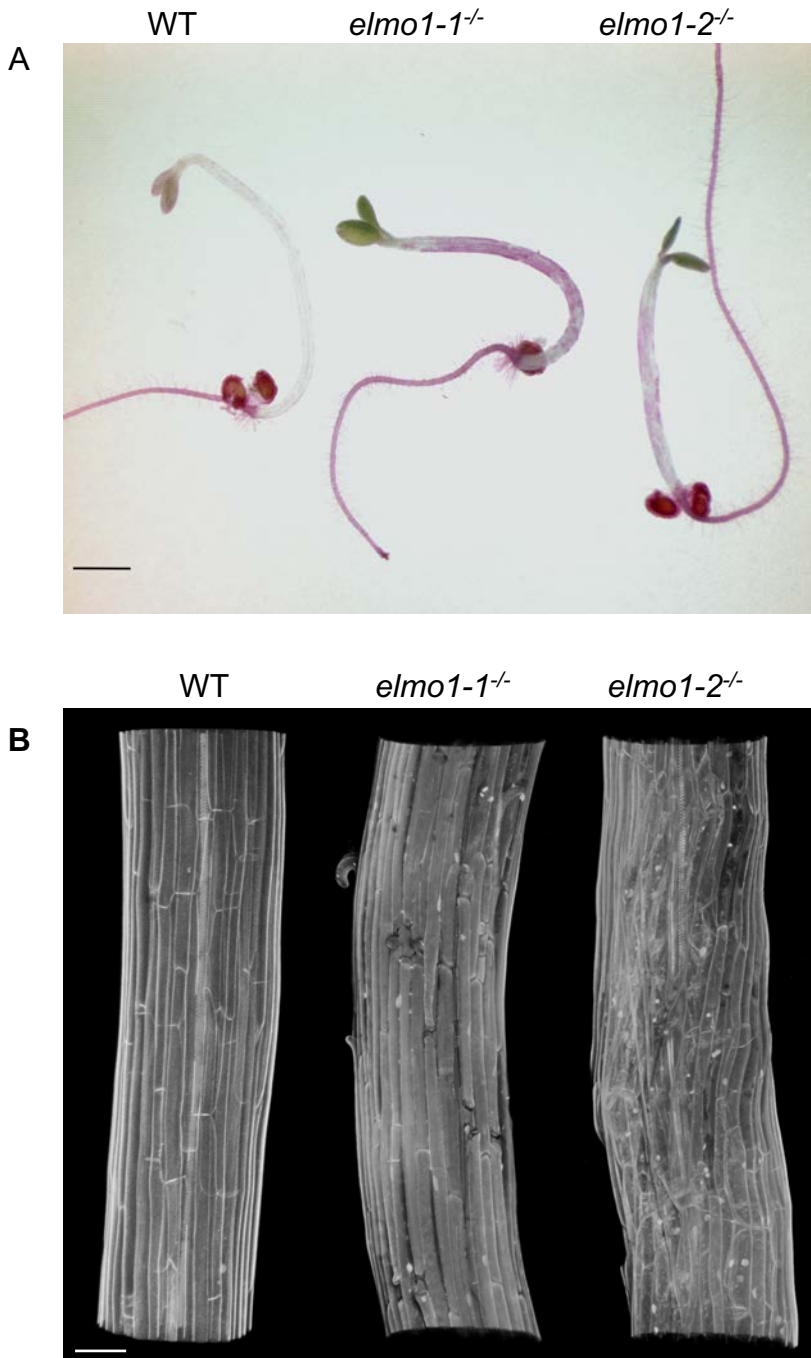

**Fig S4.** An additional allele *elmo1-2* displays cell adhesion defects. A) Shown are 4 day-old dark grown seedlings of the indicated genotype stained with Ruthenium Red. Bar indicates 1 mm. B) Confocal microscopy imaging of propidium iodide stained dark grown hypocotyls of the indicated genotype, bar indicates 50  $\mu$ m.

Fig S5

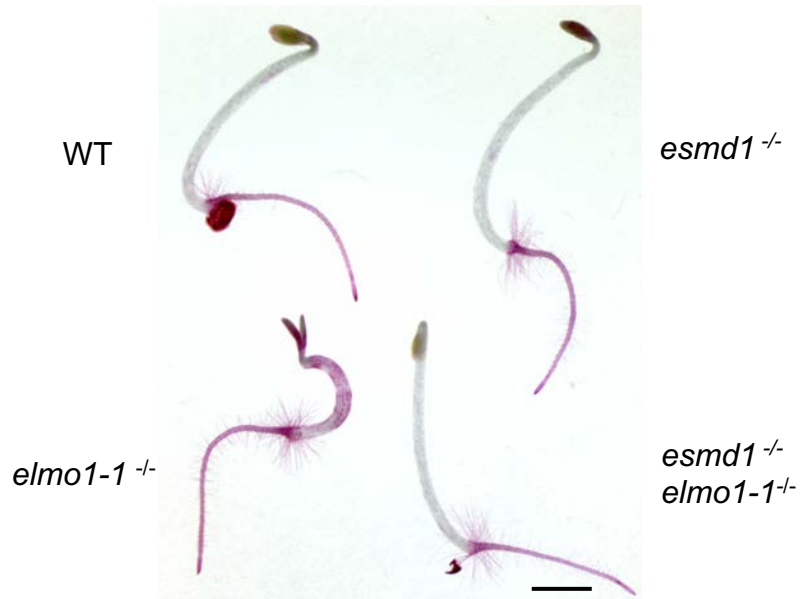

**Fig S5** . *esmd1* suppresses *elmo1*. Dark grown seedlings of the indicated genotype stained with Ruthenium Red. Bar indicates 1 mm.
